# Supplementary material for: Constitutive homologous expression of phosphoglucomutase and transaldolase increases the metabolic flux of Fusarium oxysporum
Source: PubMed Central journal article supplement (PMC3999909; doi:10.1186/1475-2859-13-43), 2014-03-20
Supplement: 1475-2859-13-43-S1.pdf [file 1475-2859-13-43-S1.pdf]

Additional file 1

**Table S1: Relative *pgm* and *tal* transcription levels of the transformants, in comparison to the wild type strain (F3).** Values were corrected according to the relative levels of total RNA, as they are represented by the density and intensity of the agarose gel bands, processed with ImageJ (NIH, Bethesda, ML, USA).

|         | <i>pgm</i> | <i>tal</i> |
|---------|------------|------------|
| F3 (wt) | 1.00       | 1.00       |
| FF1     | 2.46       | 5.02       |
| FF2     | 4.01       | 1.32       |
| FF3     | 8.92       | 1.36       |
| FF4     | 7.43       | 2.19       |
| FF5     | 2.65       | 5.89       |
| FF6     | 11.64      | 3.59       |
| FF7     | 11.95      | 1.48       |
| FF8     | 5.46       | 1.63       |
| FF10    | 4.77       | 5.73       |
| FF11    | 10.16      | 6.03       |
| FF12    | 11.65      | 1.25       |

**Table S2: Arithmetic values of the specific activity of phosphoglucomutase and transaldolase for the transformed strains, compared to the wild type (F3), when grown in liquid cultures with glucose as carbon source. Standard deviation was lower than 3%.**

|         | PGM     |             | TAL     |             |
|---------|---------|-------------|---------|-------------|
|         | U/g DCW | U/g protein | U/g DCW | U/g protein |
| F3 (wt) | 19.2    | 889.7       | 4.4     | 191.1       |
| FF1     | 44.5    | 1781.2      | 17.5    | 1077.8      |
| FF2     | 38.7    | 1215.1      | 3.6     | 205.9       |
| FF3     | 11.6    | 1178.4      | 0.5     | 23.2        |
| FF4     | 27.5    | 1284.7      | 1.9     | 45.7        |
| FF5     | 15.3    | 721.8       | 43.8    | 1799.2      |
| FF6     | 102.3   | 4287.1      | 36.6    | 1704.6      |
| FF7     | 69.8    | 3125.5      | 15.7    | 623.9       |
| FF8     | 70.7    | 3185.2      | 10.8    | 571.8       |
| FF10    | 26.4    | 988.3       | 50.7    | 2198.9      |
| FF11    | 71.6    | 3910.0      | 49.1    | 1890.8      |
| FF12    | 57.2    | 2573.4      | 3.8     | 164.5       |

**Table S3: Relative intracellular concentrations of amino and non-amino organic acids** during aerobic growth of *F. oxysporum* F3 and FF11 strains on glucose and xylose. All values are average of three sample preparations from two bioreactors for each strain and carbon source. Standard deviation was less than 5 %.

|                                                          | Glucose |       | Xylose |       |
|----------------------------------------------------------|---------|-------|--------|-------|
|                                                          | F3      | FF11  | F3     | FF11  |
| <b>Pyruvate metabolism</b>                               |         |       |        |       |
| Pyruvate                                                 | n.d.*   | n.d.  | n.d.   | n.d.  |
| Lactate                                                  | 68.6    | 205.7 | 100.9  | 129.1 |
| Valine                                                   | 147.1   | 5.8   | 1.2    | 1.1   |
| Leucine                                                  | 73.9    | 176.8 | 53.7   | 74.4  |
| Alanine                                                  | 221.0   | 347.7 | 302.2  | 196.9 |
| <b>Glycine, serine, threonine metabolism</b>             |         |       |        |       |
| Glycine                                                  | 118.4   | 273.7 | 104.7  | 137.4 |
| Serine                                                   | 4.9     | 11.7  | 4.2    | 3.9   |
| Cysteine                                                 | 0.7     | 1.1   | 0.6    | 0.4   |
| Threonine                                                | 44.9    | 100.5 | 47.2   | 32.5  |
| Aspartate                                                | 90.4    | 146.7 | 89.2   | 43.1  |
| Asparagine                                               | 22.2    | 96.2  | 57.2   | 49.4  |
| <b>Phenylalanine, tyrosine and tryptophan metabolism</b> |         |       |        |       |
| Tryptophan                                               | 5.3     | 18.1  | 5.2    | 11.1  |
| Tyrosine                                                 | 4.6     | 29.7  | 13.3   | 17.6  |
| Phenylalanine                                            | 4.2     | 13.3  | 7.8    | 10.5  |
| Phosphoenolpyruvate                                      | n.d.    | n.d.  | 0.3    | 0.1   |
| <b>Histidine metabolism</b>                              |         |       |        |       |
| Histidine                                                | 17.3    | 37.4  | 16.6   | 17.7  |
| <b>TCA cycle</b>                                         |         |       |        |       |
| Fumarate                                                 | 27.6    | 34.4  | 24.6   | 13.4  |
| Succinate                                                | 64.9    | 134.9 | 40.2   | 45.1  |
| Malate                                                   | 43.2    | 62.2  | 26.8   | 28.5  |
| Citrate                                                  | 215.3   | 310.5 | 267.7  | 171.9 |
| $\gamma$ -amino- <i>n</i> -butyric acid                  | 41.6    | 91.3  | 47.9   | 66.2  |
| <i>Cis</i> -aconitate                                    | 27.5    | 54.3  | 16.5   | 10.8  |
| <b>Glutamine and glutamate metabolism</b>                |         |       |        |       |
| Lysine                                                   | 40.1    | 64.9  | 35.5   | 44.3  |
| L-2-Amino-adipate                                        | 0.9     | 1.6   | 1.2    | 1.3   |
| Pyroglutamate                                            | 104.4   | 189.1 | 140.4  | 94.8  |
| Glutamate                                                | 96.1    | 188.1 | 1.5    | 103.4 |
| Glutamine                                                | 8.8     | 24.0  | 9.5    | 9.4   |
| <i>N</i> -acetyl-l-glutamate                             | 17.6    | 28.4  | 4.4    | 10.9  |
| Proline                                                  | 202.7   | 286.7 | 302.2  | 180.4 |
| Ornithine                                                | 84.3    | 129.4 | 103.3  | 79    |
| Glutathione                                              | 13.8    | 33.6  | 29.9   | 21.9  |
| <b>Dibasic acid metabolism</b>                           |         |       |        |       |
| Citramalate                                              | 1.2     | 1.5   | 0.9    | 1.5   |

|                          |      |      |     |     |
|--------------------------|------|------|-----|-----|
| Itaconate                | 13.6 | 31.9 | 6.4 | 5.4 |
| Nicotinate               | 4.3  | 5.3  | 5.5 | 3.6 |
| <b>Other metabolites</b> |      |      |     |     |
| Myristate                | 1.1  | 2.1  | 2.4 | 1.1 |
| L-Cystathionine          | 4.8  | 15.2 | 4.6 | 5.6 |

\*n.d.: not detected
